# Supplementary material for: Pumpkin CmHKT1;1 Controls Shoot Na+ Accumulation via Limiting Na+ Transport from Rootstock to Scion in Grafted Cucumber
Source: PubMed Central journal article supplement (PMC6165489; doi:10.3390/ijms19092648), 2018-09-06
Supplement: ijms-19-02648-s001.pdf [file ijms-19-02648-s001.pdf]

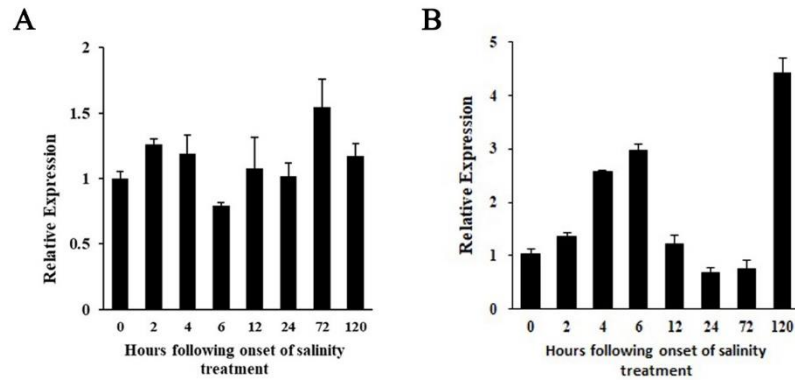

**Supplementary Figure S1. Expression of *CmHKT1;2* and *CsHKT1;1* in response to NaCl.** (A) Time-course expression analysis of *CmHKT1;2* response to NaCl (75 mM) treatment by qRT-PCR in pumpkin roots. The *Actin* gene was used as an internal control. Error bars represent SE (n = 3). (B) Time-course expression analysis of *CsHKT1;1* response to NaCl (75 mM) treatment by qRT-PCR in cucumber roots. The *Actin* gene was used as an internal control. Error bars represent SE (n = 3).

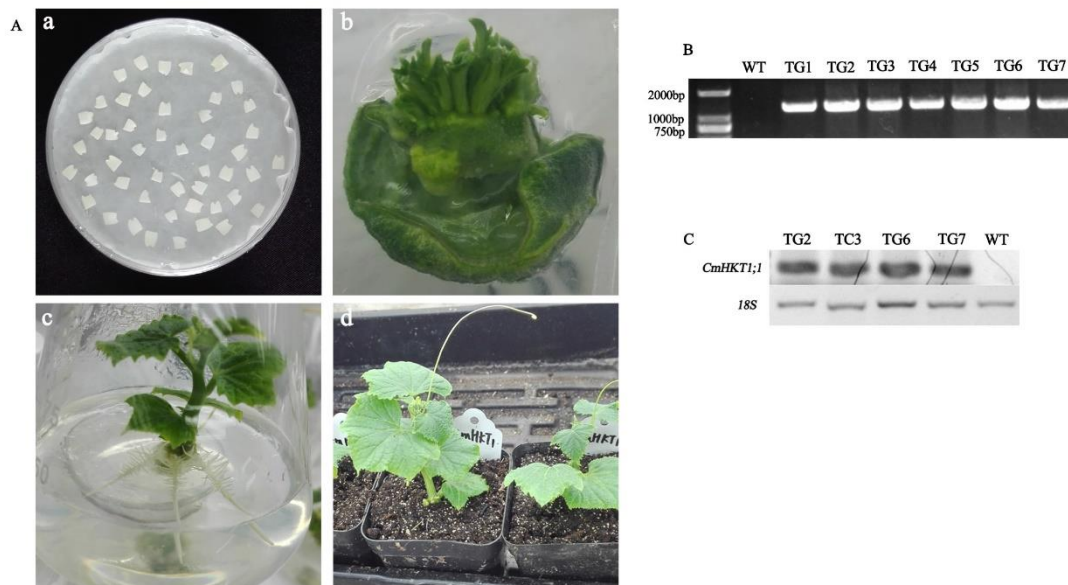

**Supplementary Figure S2. Overexpression of *CmHKT1;1* in cucumber.** (A) *Agrobacterium tumefaciens* mediated transformation in cucumber. **a**, Lower halves of cucumber cotyledons used for transformation; **b**, Explants on shoot induction medium (containing antibiotics and hormones); **c**, Shoots with kanamycin resistance were cut and cultured in MS rooting medium with antibiotics for development into whole plants; **d**, Transgenic plants were transferred to the pots with sterile substrate for naturalizing. (B) Identification of the positive transgenic plants by

PCR, with primers forward *CmHKT1;1* primer and reverse primer of OCS terminator (Oct).

(C) RT-PCR analysis of *CmHKT1;1* transcripts in transgenic cucumber.

**Supplemental Table S1. Primers used in the paper.**

| Primers             | Description            | Sequence (5' - 3')                          |
|---------------------|------------------------|---------------------------------------------|
| <i>CmHKT1;1-F</i>   | CDS clone              | ATGAAGAACTTACCACTCTATTTCCCT                 |
| <i>CmHKT1;1-R</i>   | CDS clone              | CTATGATAGTTTCCATGCTTTCCCAC                  |
| <i>CmHKT1;1-F</i>   | Transgenic line<br>PCR | TCTCCAACCTCCAACCTCCT                        |
| Oct-R               | Transgenic line<br>PCR | CGTCTCGCATATCTCATTAAAGC                     |
| <i>CmHKT1;1-F</i>   | RT-PCR                 | TCTCCAACCTCCAACCTCCT                        |
| <i>CmHKT1;1-R</i>   | RT-PCR                 | CCGACAATAGATGTGAATACC                       |
| <i>CmActin-F</i>    | RT-PCR                 | CTCTGGTGATGGTGTTAGTC                        |
| <i>CmActin-R</i>    | RT-PCR                 | TGTAAGTAGTCTCGTGGATTC                       |
| <i>CsHKT1;1-F</i>   | qRT-PCR                | TCTCATCATCACCACCCTCA                        |
| <i>CsHKT1;1-R</i>   | qRT-PCR                | CCGAATCGACATGGTTTTCT                        |
| <i>Cs18S-F</i>      | RT-PCR                 | CGAGTCTGGTAATTGGAATGAGTA                    |
| <i>Cs18S-R</i>      | RT-PCR                 | CTACGAGCTTTTTAACTGCAACAA                    |
| <i>CmHKT1;1-F</i>   | qRT-PCR                | TGTCTGTGGTCGAAATGGAA                        |
| <i>CmHKT1;1-R</i>   | qRT-PCR                | GTTCTGGTGGGAGAGTTGGA                        |
| <i>CmHKT1;2-F</i>   | qRT-PCR                | TTGTTTCCGTCGTGTTGAG                         |
| <i>CmHKT1;2-R</i>   | qRT-PCR                | AAACACTCCCAACCAACAGC                        |
| <i>CmActin-F</i>    | qRT-PCR                | CACTACACCGTTGGAAAGGAAA                      |
| <i>CmActin-R</i>    | qRT-PCR                | CAAAAGGAGGGAGCCGAGA                         |
| <i>CsHKT1;1-F</i>   | qRT-PCR                | TCTCATCATCACCACCCTCA                        |
| <i>CsHKT1;1-R</i>   | qRT-PCR                | CCGAATCGACATGGTTTTCT                        |
| <i>CsActin-F</i>    | qRT-PCR                | CCACGAACTACTTACAACCTCCATC                   |
| <i>CsActin-R</i>    | qRT-PCR                | GGGCTGTGATTTCTTGCTC                         |
| <i>CmHKT1;1-SP6</i> | <i>in situ</i> probe   | GATTTAGGTGACACTATAGAATGCTTGGCTCACCTCTGCTATT |
| <i>CmHKT1;1-T7</i>  | <i>in situ</i> probe   | TGTAATACGACTCACTATAGGGATCACCGAGTTGTTCTCA    |
